# Supplementary material
Source: publisher site journal article supplement (https://www.dovepress.com/article/423330)
Supplement: Supplementary file 1 [file get_supplementary_file.php]

**BRCA1 90 patients**

**BRCA2 79 patients**

**824 breast cancer patients received BRCA testing between 2016-2020 at 3 hospital**

**248 breast cancer patients confirmed to harboring BRCA mutation**

**203 breast cancer patients with BRCA mutation**

**169 early breast cancer patients with BRCA pathogenic or likely pathogenic mutation for analysis**

**Patients with no access to acquire pathological, surgical or treatment information and follow up information (n=45)**

**1.Patients with recurrent or metastatic breast cancer (n=4)**

**2.Patients harboring benign /likely benign/VUS BRCA mutation (n=30)**

**Figure S1**. Flowchart of patient selection.

**Table S1** BRCA1 and BRCA2 recurrent mutations

| Gene | Exon | cDNA | protein | No.of patient |
| --- | --- | --- | --- | --- |
| BRCA1 | 3 | c.132C>T | p.Cys44Cys | 2 |
|  | 7 | c.376C>T | p.Gln126Ter | 2 |
|  | 7 | c.441+2T>A | Splicing | 2 |
|  | 11 | c.1214C>G | p.Ser405Ter | 2 |
|  | 11 | c.1465G>T | p.Glu489Ter | 3 |
|  | 11 | c.1600C>T | p.Gln534Ter | 2 |
|  | 11 | c.2138C>G | p.Ser713Ter | 2 |
|  | 11 | c.3916_3917del | p.Leu1306fs | 2 |
|  | 11 | c.4065_4068del | p.Asn1355fs | 4 |
|  | 16 | c.4801A>T | p.Lys1601Ter | 3 |
|  | 17 | c.4987-5T>C | Splicing | 2 |
|  | 24 | c.5470_5477del | p.Ile1824fs | 11 |
|  | 24 | c.5521del | p.Ser1841fs | 3 |
| BRCA2 | 10 | c.1298dup | p.Asn433fs | 2 |
|  | 10 | c.1310_1313del | p.Lys437fs | 3 |
|  | 11 | c.2059_2063del | p.Asp687fs | 2 |
|  | 11 | c.4440T>G | p.Tyr1480Ter | 2 |
|  | 11 | c.5576_5579del | p.Ile1859fs | 2 |
|  | 11 | c.5851_5854del | p.Ser1951fs | 2 |
|  | 11 | c.6699_6702dup | p.Met2235fs | 2 |
|  | 20 | c.8517C>A | p.Tyr2839Ter | 2 |
|  | 22 | c.8951C>G | p.Ser2984Ter | 2 |
|  | 23 | c.9117+1G>A | Splicing | 2 |

**Table S2**. Events at a median follow-up of 33 months

|  | Total  （n=169） | BRCA1  （n=90） | BRCA2  （n=79） |
| --- | --- | --- | --- |
| First recurrence |  |  |  |
| Locoregional only | 12 | 8 | 4 |
| Distant only | 10 | 6 | 4 |
| Combined | 1 | 0 | 1 |
| Contralateral invasive breast cancer | 26 | 13 | 13 |
| Second primary cancer | 7 | 4 | 5 |
| Ovarian cancer | 6 | 2 | 4 |
| Thyroid cancer | 1 | 0 | 1 |
| Location of distant recurrence |  |  |  |
| Lung | 4 | 3 | 1 |
| Bone | 5 | 1 | 4 |
| Liver | 2 | 2 | 0 |
| Brain | 1 | 1 | 0 |
| Ovarian and oviduct | 1 | 1 | 0 |


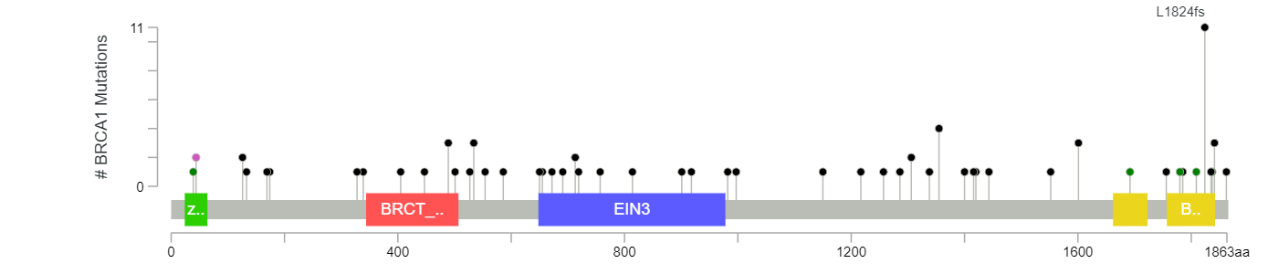


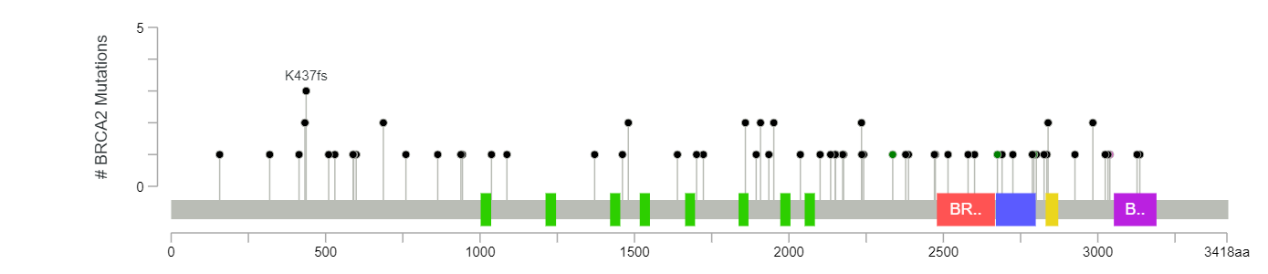


**Figure S2**. Lollipop plots showing the distribution and frequency of BRCA1 and BRCA2 mutation.
